# Supplementary material
Source: Springer Nature journal article supplement (https://www.springermedizin.de/resource/supplementary/13049_2010_174_MOESM1_ESM.pdf/9666034)

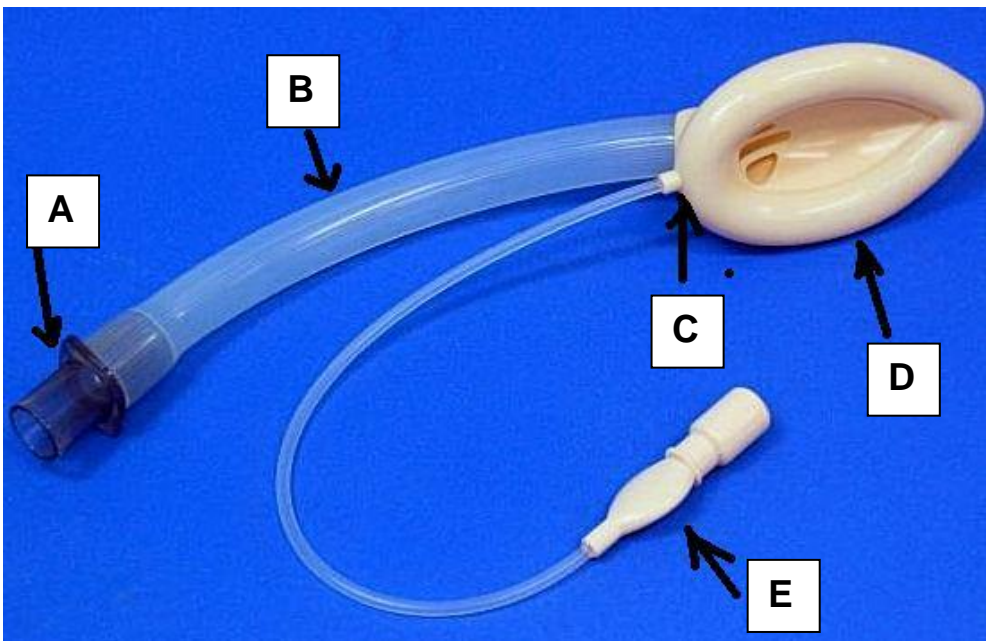

Supplement: MOESM1 [file 9666034]
